# Supplementary material for: Metal–ligand ratio-controlled assembly of two pairs of Co(ii) complexes: syntheses, structures and magnetic properties
Source: Royal Society of Chemistry journal article supplement (doi:10.1039/c2ce25272d), 2012-01-01
Supplement: c2ce25272d.pdf [file c2ce25272d.pdf]

Electronic Supplementary Material for CrystEngComm

## **Electronic Supplementary Information (ESI)**

### **Metal-ligand ratio-controlled assembly of two pairs of Co(II) complexes: syntheses, structures and magnetic properties**

Fanghua Zhao, Shuai Jing, Yunxia Che and Jimin Zheng\*

Department of Chemistry, Nankai University, Tianjin 300071, P. R. China.

Electronic Supplementary Material for CrystEngComm

**Table S1.** Selected bond lengths (Å) and bond angles (°) for complexes **1-4**

| <b>1</b>     |            |                     |            |                     |            |
|--------------|------------|---------------------|------------|---------------------|------------|
| Co(1)-O(1)   | 2.0487(15) | O(1)-Co(1)-O(2)     | 107.91(6)  | O(2)-Co(1)-N(1)     | 91.56(7)   |
| Co(1)-O(2)   | 2.0296(16) | O(1)-Co(1)-O(4)     | 147.62(7)  | O(2)-Co(1)-N(4)     | 85.60(7)   |
| Co(1)-O(4)   | 2.1096(17) | O(1)-Co(1)-N(1)     | 96.17(7)   | O(4)-Co(1)-N(1)     | 88.04(7)   |
| Co(1)-N(1)   | 2.1054(19) | O(1)-Co(1)-N(3)     | 87.34(7)   | O(4)-Co(1)-N(4)     | 89.97(7)   |
| Co(1)-N(4)   | 2.120(2)   | O(2)-Co(1)-O(4)     | 104.03(7)  | N(1)-Co(1)-N(4)     | 176.04(7)  |
| <b>2</b>     |            |                     |            |                     |            |
| Co(1)-O(2)   | 1.9978(16) | Co(1)-O(1)          | 2.4503(15) | O(3)#1-Co(1)-N(1)   | 102.89(8)  |
| Co(1)-O(3)#1 | 1.9524(16) | O(2)-Co(1)-N(1)     | 127.94(8)  | O(3)#1-Co(1)-N(3)#2 | 114.31(7)  |
| Co(1)-N(1)   | 2.0249(19) | O(2)-Co(1)-N(3)#2   | 105.47(7)  | N(1)-Co(1)-N(3)#2   | 107.47(7)  |
| Co(1)-N(3)   | 2.0923(19) | O(3)#1-Co(1)-O(2)   | 98.78(7)   |                     |            |
| <b>3</b>     |            |                     |            |                     |            |
| Co(1)-O(1)   | 2.390(4)   | O(4)#1-Co(1)-O(2)   | 99.91(14)  | N(1)-Co(1)-N(4)     | 129.93(19) |
| Co(1)-O(2)   | 2.006(4)   | O(4)#1-Co(1)-N(1)   | 100.87(18) | O(4)#1-Co(1)-O(1)   | 158.79(14) |
| Co(1)-O(4)#1 | 1.993(4)   | O(2)-Co(1)-N(1)     | 111.05(18) | O(2)-Co(1)-O(1)     | 59.06(14)  |
| Co(1)-N(1)   | 2.011(5)   | O(4)#1-Co(1)-N(4)   | 99.86(19)  | N(1)-Co(1)-O(1)     | 90.45(17)  |
| Co(1)-N(4)   | 2.044(5)   | O(2)-Co(1)-N(4)     | 109.5(2)   | N(4)-Co(1)-O(1)     | 86.03(19)  |
| <b>4</b>     |            |                     |            |                     |            |
| Co(1)-O(1)#1 | 2.1380(15) | O(2)-Co(1)#1        | 2.3345(16) | N(1)-Co(1)-O(2)#1   | 94.57(7)   |
| Co(1)-O(2)#1 | 2.3345(17) | O(1)#4-Co(1)-O(2)#1 | 58.43(6)   | N(3)-Co(1)-N(1)     | 175.27(8)  |
| Co(1)-O(4)   | 2.0675(16) | O(4)-Co(1)-N(1)     | 90.80(7)   | N(3)-Co(1)-O(1)#1   | 91.48(7)   |
| Co(1)-O(7)   | 2.0448(15) | O(4)-Co(1)-N(3)     | 85.12(7)   | N(3)-Co(1)-O(2)#1   | 88.61(7)   |
| Co(1)-N(1)   | 2.115(2)   | O(4)-Co(1)-O(1)#1   | 104.39(6)  | O(3)-Co(2)-O(5)     | 121.02(7)  |
| Co(1)-N(3)   | 2.097(2)   | O(4)-Co(1)-O(2)#1   | 161.60(6)  | O(3)-Co(2)-N(6)     | 118.54(9)  |
| Co(2)-O(3)   | 1.9537(16) | O(7)-Co(1)-N(1)     | 92.61(7)   | O(5)-Co(2)-N(6)     | 95.16(9)   |
| Co(2)-O(5)   | 1.9761(17) | O(7)-Co(1)-O(1)#1   | 151.86(6)  | O(7)-Co(1)-O(2)#1   | 93.58(6)   |
| Co(1)-O(7)   | 2.0448(15) | O(7)-Co(1)-O(2)#1   | 93.58(6)   | O(8)-Co(2)-O(3)     | 107.56(8)  |
| Co(2)-O(8)   | 1.9464(17) | O(7)-Co(1)-O(4)     | 103.75(6)  | O(8)-Co(2)-O(5)     | 106.35(8)  |
| Co(2)-N(6)   | 2.023(2)   | O(7)-Co(1)-N(3)     | 90.68(7)   | O(8)-Co(2)-N(6)     | 106.81(9)  |
| O(1)-Co(1)#1 | 2.1380(15) | N(1)-Co(1)-O(1)#1   | 87.22(7)   |                     |            |

Symmetry code: for **2**, #1 x,-y+1/2,z+1/2; #2 x,y-1,z; for **3**, #1 x+1,y,z; for **4**, #1 -x+1,-y+1,-z.

**Table S2.** Hydrogen bond lengths (Å) and bond angles (°) for complexes **1-4**

|          | D-H...A             | d(D-H) | d(H...A) | d(D...A) | ∠(D-H...A) |
|----------|---------------------|--------|----------|----------|------------|
| <b>1</b> | N(5)-H(5A)...O(3)#1 | 0.82   | 1.91     | 2.681(2) | 156.3      |
|          | N(3)-H(3A)...O(1)#3 | 0.86   | 2.59     | 3.045(3) | 114.3      |
| <b>2</b> | N(3)-H(3A)...O(4)#2 | 0.86   | 2.24     | 2.981(2) | 144.6      |
|          | N(3)-H(3B)...O(2)#1 | 0.86   | 2.47     | 3.031(2) | 123.5      |
|          | O(5)-H(5A)...O(3)#2 | 0.86   | 2.03     | 2.842(6) | 157.6      |
| <b>3</b> | O(5)-H(5B)...O(3)#1 | 0.85   | 2.20     | 2.969(7) | 149.9      |
|          | N(5)-H(5C)...O(5)#3 | 0.88   | 1.83     | 2.661(6) | 157.3      |
| <b>4</b> | N(7)-H(7B)...O(6)#2 | 0.81   | 1.86     | 2.651(2) | 165.3      |

Electronic Supplementary Material for CrystEngComm

---

|                     |      |      |          |       |
|---------------------|------|------|----------|-------|
| N(8)-H(8A)...O(2)#1 | 0.82 | 1.95 | 2.738(2) | 160.4 |
|---------------------|------|------|----------|-------|

---

Symmetry code: for **1**, #1 -x+1, -y+2, -z; for **2**, #1 -x+1, y+1/2, -z+1/2, #2 -x+1, -y+2, -z, #3 x,

y+1, z; for **3**, #1 -x+1, -y+1, -z+1 #2 x+1, y, z, #3 x, y+1, z; for **4**, #1 x, y+1, z+1, #2 -x, -y, -z.

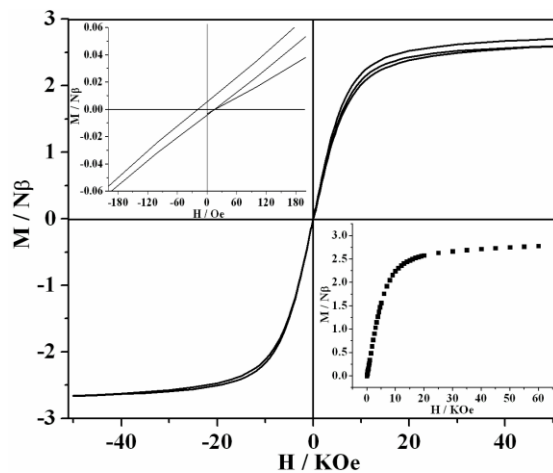

**Fig. S1** The hysteresis loop for **1** at 2.0 K; The inset gives a blown-up view of the hysteresis loop below 200 Oe (left) and field dependence of magnetization (right).

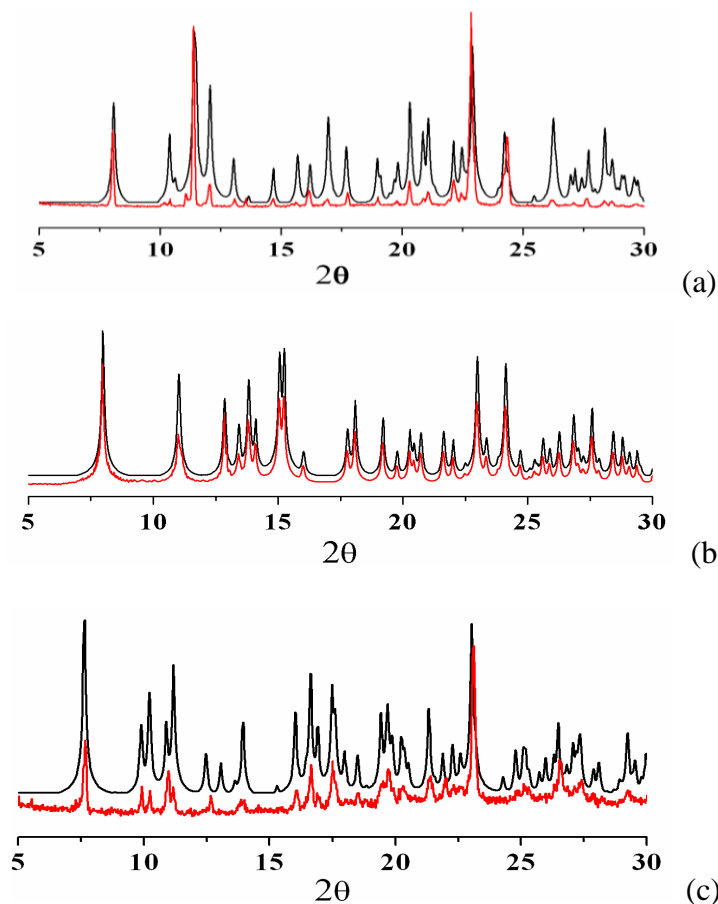

Electronic Supplementary Material for CrystEngComm

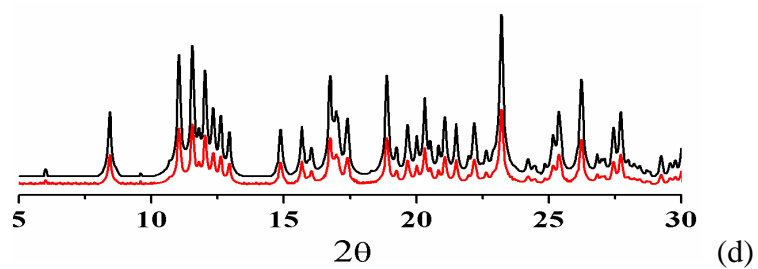

**Fig. S2** The simulated (Black) and experimental (Red) PXR D of the three compounds

((a) for **1**, (b) for **2**, (c) for **3** and (d) for **4**).
